# Supplementary material
Source: Royal Society of Chemistry journal article supplement (doi:10.1039/d6nj00659k)
Supplement: d6nj00659k1.pdf [file d6nj00659k1.pdf]

## Supporting Information

# PPDO/PCL/PEG Based Amphiphilic Polyurethanes with Controllable Degradation and Mechanical Retention

Yue Chen<sup>1</sup>, Qi Wang<sup>1</sup>, Yuan Bai<sup>2</sup>, Jing Li<sup>1\*</sup>, Nan Zhang<sup>3</sup>, Bin He<sup>1\*</sup>

<sup>1</sup> National Engineering Research Center for Biomaterials, College of Biomedical Engineering, Sichuan University, Cheng du 610064, China

<sup>2</sup> Ningbo Baoting Biotechnology LTD, Ningbo 315000, China

<sup>3</sup> Institute of Organoid on Chip and Drug Translation Research, Henan Academy of Sciences, Zhengzhou 450046, China

\* Corresponding authors, E-mail: sakura-blossoms@foxmail.com (Dr J. Li)  
bhe@scu.edu.cn (Dr. Bin He)

**Table S1.** MLLass fractions of each component calculated from the <sup>1</sup>H NMR spectrum.

| Name                | PCL (wt%) | PPDO-PEG-PPDO (wt%) | PEG (2000 g/mol) (wt%) | Total PEG (wt%) |
|---------------------|-----------|---------------------|------------------------|-----------------|
| PDEU <sub>1.5</sub> | 36.3      | 37.0                | 26.7                   | 39.0            |
| PDEU <sub>3.5</sub> | 45.4      | 23.8                | 30.8                   | 38.7            |
| PDEU <sub>5.5</sub> | 50.7      | 15.7                | 33.6                   | 38.8            |

**Table S2.** T<sub>a</sub> and Mass fractions of each component estimated from TG and DTG curves.

| Name                | T <sub>a</sub> (°) | PPDO wt% | PCLwt% | PEG wt% | PPDO:PCL |
|---------------------|--------------------|----------|--------|---------|----------|
| PDEU <sub>1.5</sub> | 245.8              | 23.7     | 34.5   | 40.9    | 1:1.5    |
| PDEU <sub>3.5</sub> | 236.8              | 13.1     | 45.8   | 40.7    | 1:3.5    |
| PDEU <sub>5.5</sub> | 266.2              | 8.7      | 48.0   | 40.0    | 1:5.5    |

**Table S3.** Body weight changes of experimental rats at different time points during subcutaneous implantation.

| Sample/Mass (g) | Implantation Time (Week) |     |     |     |     |
|-----------------|--------------------------|-----|-----|-----|-----|
|                 | 0                        | 1   | 4   | 7   | 10  |
| 1               | 253                      | 320 |     |     |     |
| 2               | 300                      | 335 |     |     |     |
| 3               | 306                      | 334 |     |     |     |
| 4               | 232                      | 277 | 379 |     |     |
| 5               | 183                      | 210 | 330 |     |     |
| 6               | 179                      | 219 | 241 |     |     |
| 7               | 313                      | 346 | 441 | 485 |     |
| 8               | 262                      | 302 | 379 | 430 |     |
| 9               | 186                      | 227 | 341 | 380 |     |
| 10              | 232                      | 280 | 362 | 397 | 436 |
| 11              | 223                      | 270 | 362 | 403 | 403 |
| 12              | 179                      | 217 | 258 | 306 | 355 |

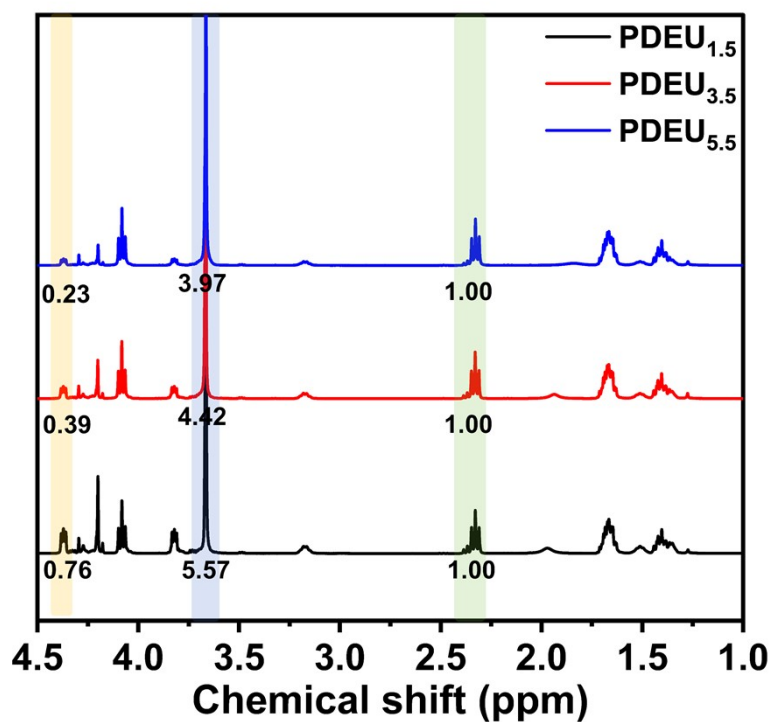

**Figure S1.**  $^1\text{H}$  NMR spectra and characteristic peak integrals (determined using MestReNova software) of PDEU<sub>1.5</sub>, PDEU<sub>3.5</sub>, and PDEU<sub>5.5</sub> at the initial degradation stage (day 0).

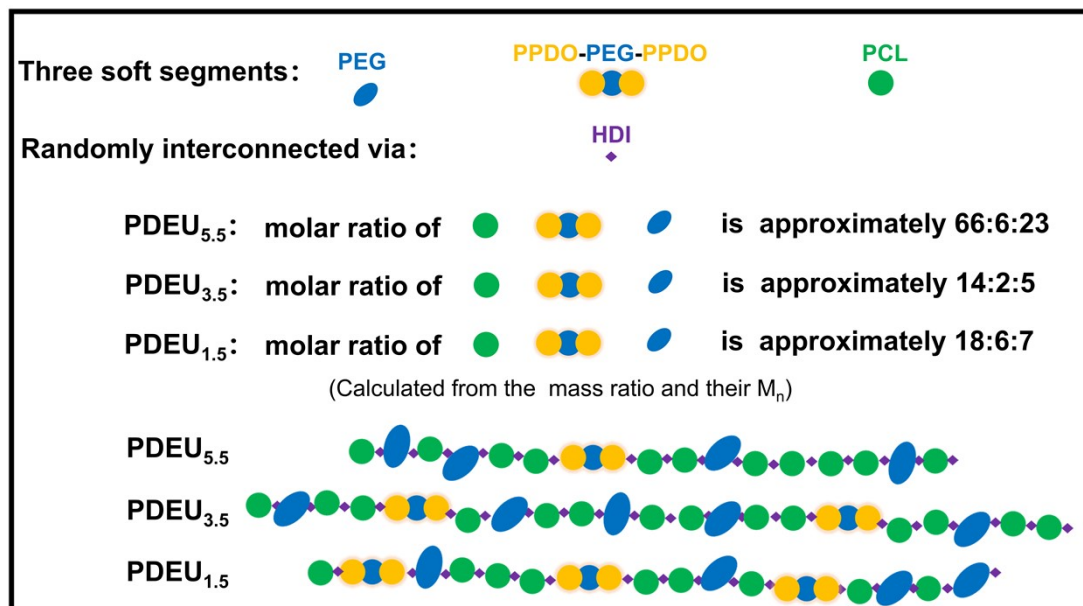

**Figure S2.** Schematic illustration of the structures of PDEU<sub>1.5</sub>, PDEU<sub>3.5</sub>, and PDEU<sub>5.5</sub>.

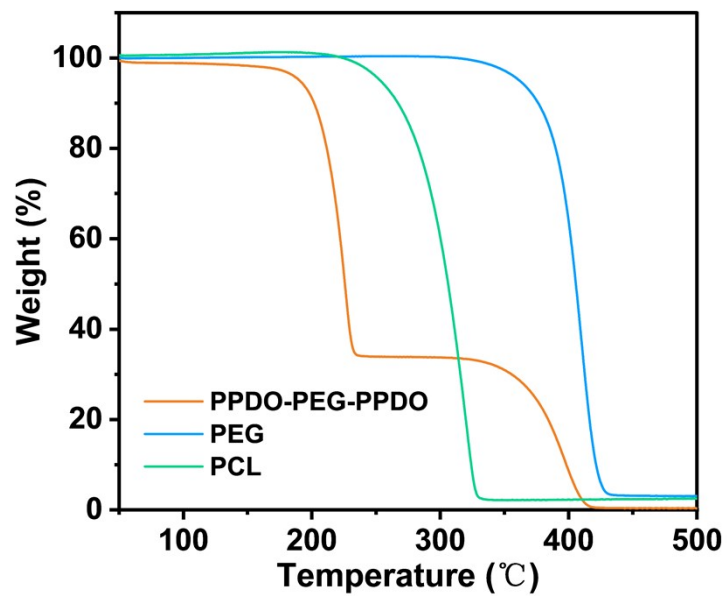

Figure S3. TG curves of PPDO-PEG-PPDO, PCL<sub>1000</sub>, and PEG<sub>2000</sub>.

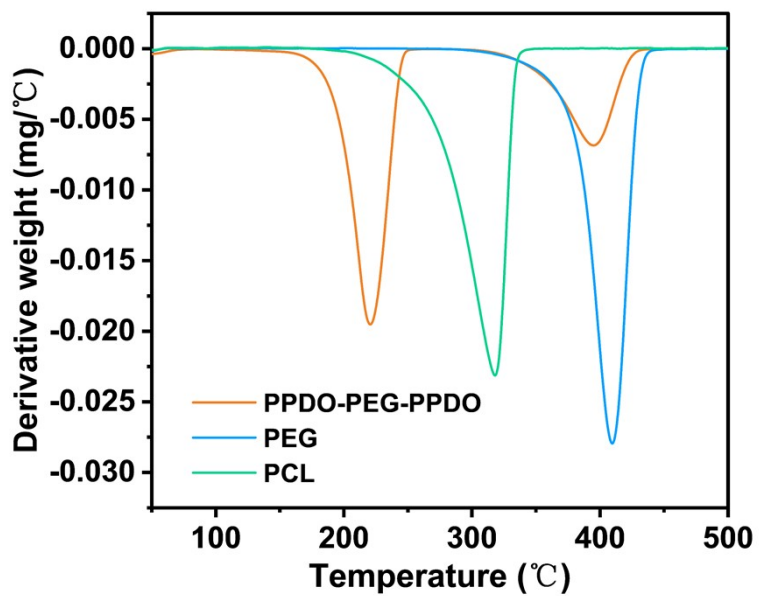

Figure S4. DTG curves of PPDO-PEG-PPDO, PCL<sub>1000</sub>, and PEG<sub>2000</sub>.

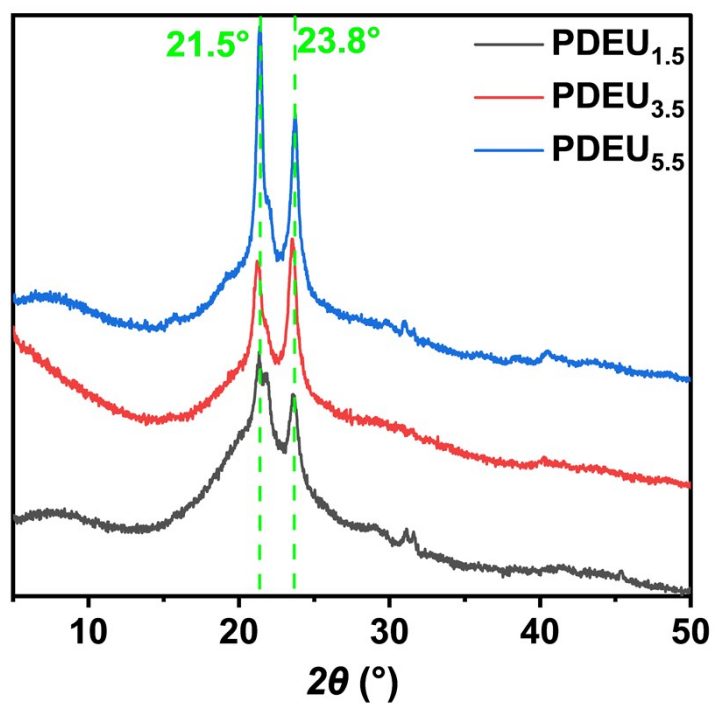

**Figure S5.** XRD patterns of PDEUs at terminal degradation points (PDEU<sub>1.5</sub> at day 54, PDEU<sub>3.5</sub> at day 90, PDEU<sub>5.5</sub> at day 156).

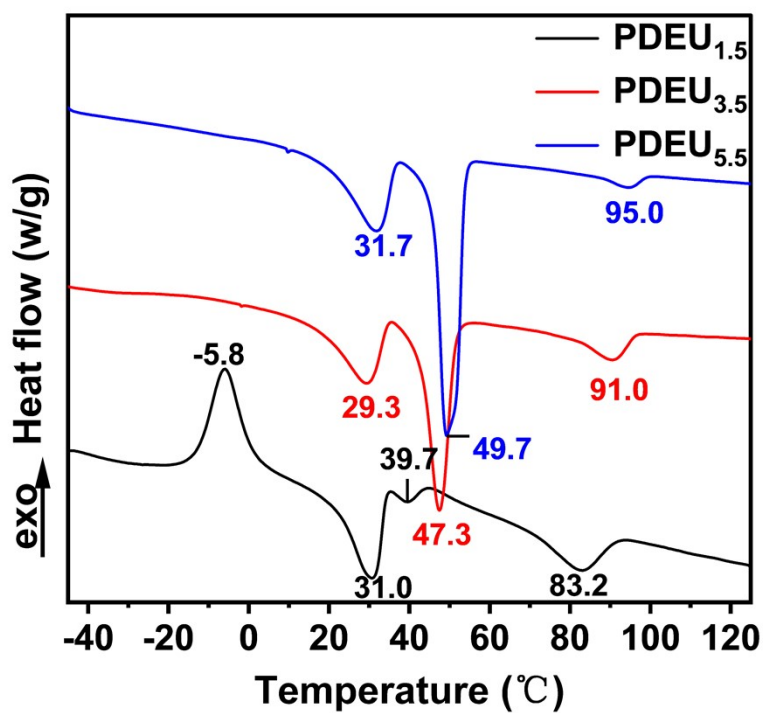

**Figure S6.** Second Heating DSC Curves of PDEUs at terminal degradation points

(PDEU<sub>1.5</sub> at day 54, PDEU<sub>3.5</sub> at day 90, PDEU<sub>5.5</sub> at day 156).

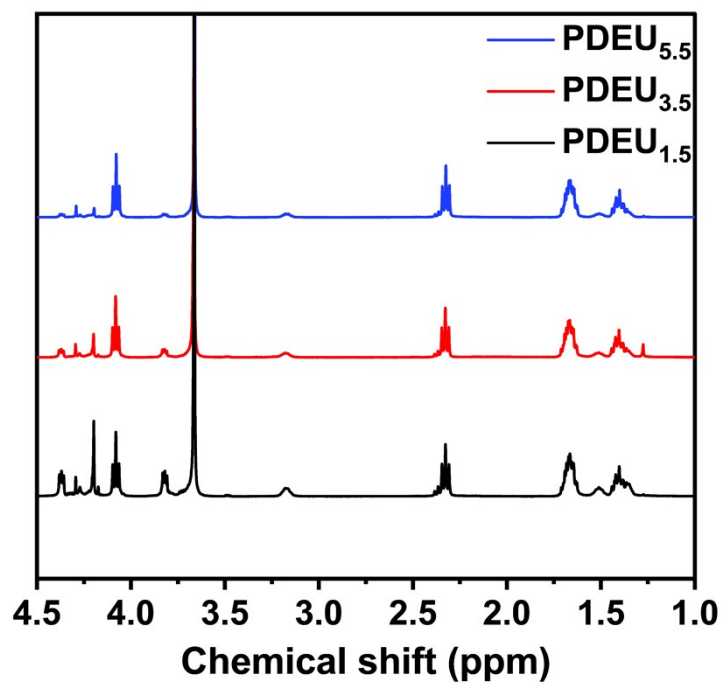

**Figure S7.** <sup>1</sup>H NMR Spectra of PDEUs at terminal degradation points (PDEU<sub>1.5</sub> at day 54, PDEU<sub>3.5</sub> at day 90, PDEU<sub>5.5</sub> at day 156).

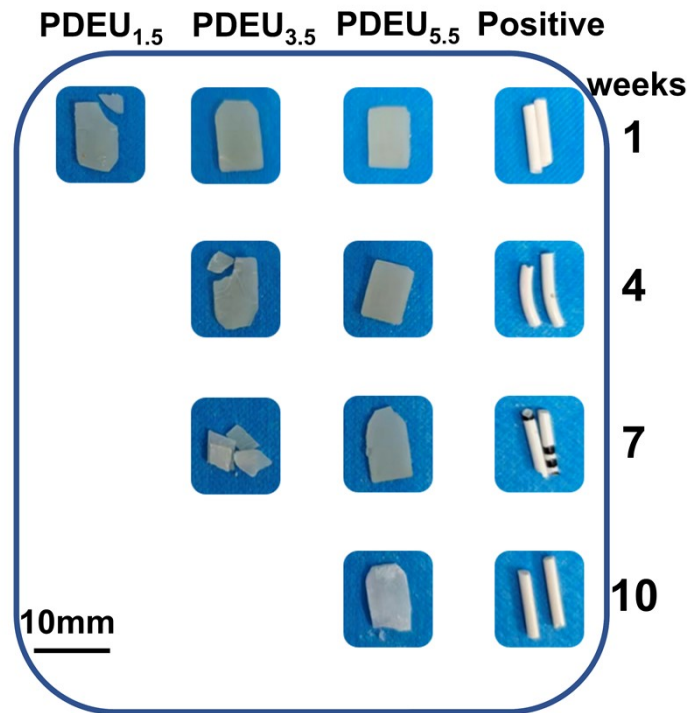

**Figure S8.** Macroscopic morphologies of PDEUs and mass-matched commercial polyurethane-based ureteral stents (positive control) retrieved at different time points (1, 4, 7, and 10 weeks) after subcutaneous implantation in rats.

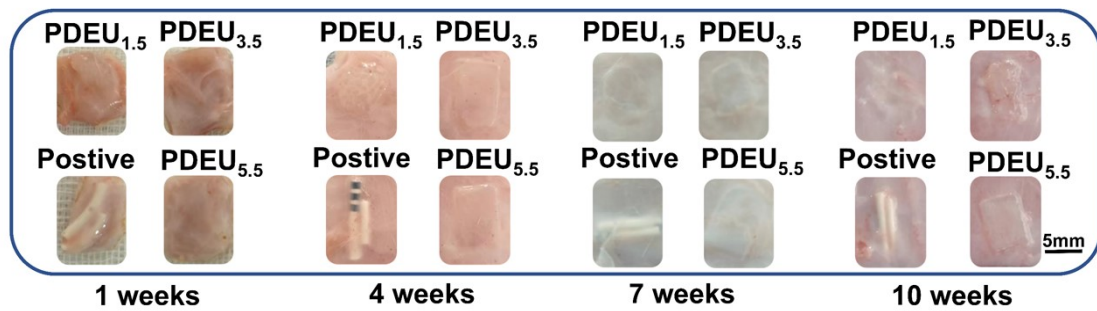

**Figure S9.** Macroscopic morphologies of the materials and surrounding skin tissues on the dorsal region of rats at different time points.

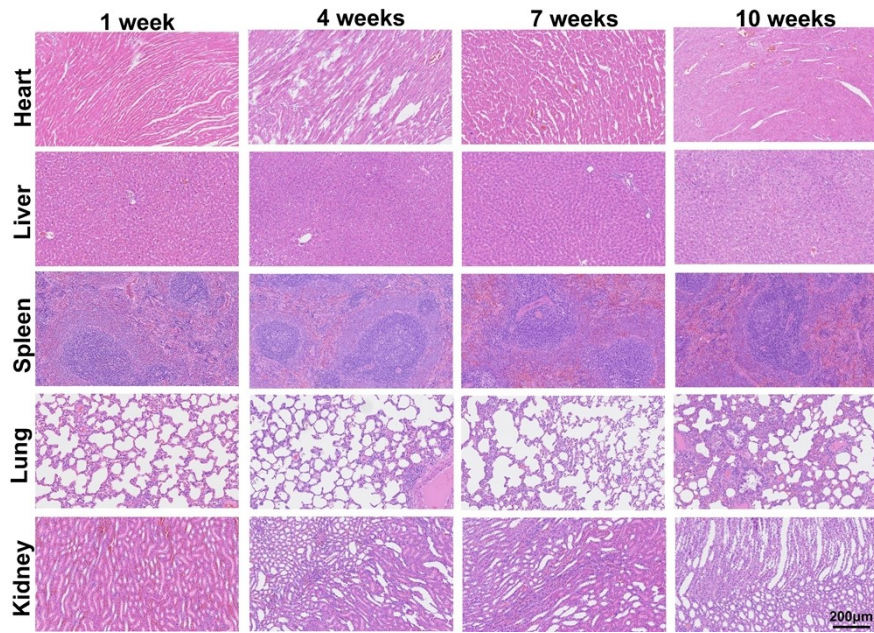

**Figure S10.** H&E-stained sections of major organs in rats at different time points during the subcutaneous implantation experiment.
